# Supplementary material for: Taurine depletion impairs cardiac function and affects tolerance to hypoxia and high temperatures in brook char (Salvelinus fontinalis)
Source: Oxford University Press journal article supplement (doi:10.1242/jeb.245092), 2023-02-02
Supplement: jeb245092supp.pdf [file jeb245092supp.pdf]

**Table S1.** Hematology and plasma lactate and osmolality in control and TD brook char following acute exposure to graded hypoxia and reoxygenation. MCHC; mean corpuscular hemoglobin concentration. No significant differences between control and TD treatment groups were noted.

| Treatment | Hematocrit (%) | Hemoglobin (g L <sup>-1</sup> ) | MCHC (g L <sup>-1</sup> ) | Lactate (mmol L <sup>-1</sup> ) | Osmolality (mOsmol kg <sup>-1</sup> ) |
|-----------|----------------|---------------------------------|---------------------------|---------------------------------|---------------------------------------|
| Control   | 41.4 ± 2.2     | 70.2 ± 4.3                      | 171.0 ± 10.6              | 4.20 ± 1.78                     | 295.9 ± 7.3                           |
| TD        | 37.3 ± 2.1     | 60.0 ± 4.1                      | 169.0 ± 8.6               | 2.35 ± 0.82                     | 294.8 ± 4.0                           |

**Table S2.** Morphometric measurements (in µm) and the frequency of various cell types (number of cells 1000 µm<sup>-2</sup>) found on gill filaments from control (n = 8) and TD brook char (n = 4).

|         | Filament width | Lamellae length | Lamellae thickness | Apical pits | Mucosal cells | Ionocytes |
|---------|----------------|-----------------|--------------------|-------------|---------------|-----------|
| Control | 170.5 ± 7.4    | 146.5 ± 10.8    | 18.0 ± 1.1         | 4.5 ± 2.5   | 3.3 ± 0.8     | 1.8 ± 0.8 |
| TD      | 184.2 ± 15.6   | 163.8 ± 15.4    | 21.6 ± 3.0         | 4.3 ± 2.0   | 4.5 ± 3.2     | 1.5 ± 0.3 |
